# Supplementary material
Source: publisher site journal article supplement (https://www.dovepress.com/get_supplementary_file.php?f=263745.docx)
Supplement: Supplementary file 1 [file get_supplementary_file.php]

**Online Supplementary materials**

**Methods**

**Outcome assessments**

Acute oral steroid use associated with COPD exacerbation treatment are defined as:

- all courses that are definitely not part of maintenance therapy, and/or
- all courses where dosing instructions suggest exacerbation treatment (e.g. 6,5,4,3,2,1 reducing, or 30mg as directed), and/or
- all courses with no dosing instructions, but unlikely to be maintenance therapy due to prescription strength or frequency of prescriptions.

**Results**

Unmatched baseline characteristics of patients after applying inclusion and exclusion criteria are presented in Supplementary Table S1. The baseline characteristics of matched patients within the exploratory group without asthma diagnosis are presented in Supplementary Table S2.

**Table S1. Baseline characteristics in unmatched group of patients**

|  |  | **BDP/FF**  **N=549** | **FP/SAL**  **N=3,374** | **BUD/FF**  **N=3,001** |
| --- | --- | --- | --- | --- |
| Gender | Male | 298 (54.3) | 1,941 (57.5) | 1,713 (57.1) |
| Age (years) | ≥35 <45 | 12 (2.2) | 38 (1.1) | 53 (1.8) |
| ≥45 <55 | 43 (7.8) | 239 (7.1) | 244 (8.1) |
| ≥55 <65 | 118 (21.5) | 864 (25.6) | 749 (25.0) |
| ≥65 | 376 (68.5) | 2,233 (66.2) | 1,955 (65.1) |
| BMI (kg/m2) | n (% non-missing) | 549 (100.0) | 3,362 (99.6) | 2,998 (99.9) |
| <18.5 | 30 (5.5) | 191 (5.7) | 153 (5.1) |
| ≥18.5-<25 | 184 (33.5) | 1,258 (37.4) | 1,108 (37.0) |
| ≥25-<30 | 194 (35.3) | 1,064 (31.6) | 951 (31.7) |
| ≥30 | 141 (25.7) | 849 (25.3) | 786 (26.2) |
| Patient reported smoking status | Non-smoker | 24 (4.4) | 162 (4.8) | 120 (4.0) |
| Current smoker | 228 (41.5) | 1,395 (41.3) | 1,158 (38.6) |
| Ex-smoker | 297 (54.1) | 1,817 (53.9) | 1,723 (57.4) |
| Baseline SABA prescriptions | 0 | 135 (24.6) | 568 (16.8) | 547 (18.2) |
| 1 | 39 (7.1) | 215 (6.4) | 227 (7.6) |
| 2-4 | 83 (15.1) | 627 (18.6) | 522 (17.4) |
| 5-10 | 147 (26.8) | 1,097 (32.5) | 897 (29.9) |
| ≥11 | 145 (26.4) | 867 (25.7) | 808 (26.9) |
| Average daily dose of SABA (µg) | 0 | 135 (24.6) | 568 (16.8) | 547 (18.2) |
| >0 to <200 | 85 (15.5) | 613 (18.2) | 572 (19.1) |
| 200 to <400 | 113 (20.6) | 664 (19.7) | 642 (21.4) |
| ≥400 | 216 (39.3) | 1529 (45.3) | 1,240 (41.3) |
| ICS combination inhalers prescription | 0 | 188 (34.2) | 1,143 (33.9) | 1,347 (44.9) |
| 1 | 26 (4.7) | 136 (4.0) | 185 (6.2) |
| 2-4 | 56 (10.2) | 354 (10.5) | 399 (13.3) |
| 5-10 | 148 (27.0) | 897 (26.6) | 619 (20.6) |
| ≥11 | 131 (23.9) | 844 (25.0) | 451 (15.0) |
| Total ICS dosage (µg BDP equivalent) | 0-249 | 240 (43.7) | 1,388 (41.1) | 1,614 (53.8) |
| 250-499 | 151 (27.5) | 880 (26.1) | 793 (26.4) |
| 500+ | 158 (28.8) | 1,106 (32.8) | 593 (19.8) |
| LAMA prescriptions | Yes | 349 (63.6) | 2,034 (60.3) | 1,494 (49.8) |
| LABA prescriptions | Yes | 64 (11.7) | 542 (16.1) | 760 (25.3) |
| Theophylline prescriptions | Yes | 38 (6.9) | 399 (11.8) | 305 (10.2) |
| LTRA prescriptions | Yes | 32 (5.8) | 138 (4.1) | 150 (5.0) |
| Maintenance OCS | Yes | 38 (6.9) | 162 (4.8) | 139 (4.6) |
| Asthma diagnosisa | Yes | 227 (41.3) | 1,294 (38.4) | 1,233 (41.1) |
| Active Anxiety or depression diagnosis | Yes | 138 (25.1) | 704 (20.9) | 529 (17.6) |
| Ischaemic heart disease diagnosis | Yes | 115 (20.9) | 626 (18.6) | 494 (16.5) |
| Hypertension diagnosis | Yes | 231 (42.1) | 1,319 (39.1) | 1,094 (36.5) |
| Diabetes diagnosis | Yes | 87 (15.8) | 437 (13.0) | 333 (11.1) |
| Charlson Comorbidity Index | 0-2 | 348 (63.4) | 2,170 (64.3) | 1,941 (64.7) |
| 3-4 | 139 (25.3) | 820 (24.3) | 786 (26.2) |
| 5+ | 62 (11.3) | 384 (11.4) | 274 (9.1) |
| Baseline Moderate/severe COPD exacerbationsb | 0 | 49 (8.9) | 284 (8.4) | 281 (9.4) |
| 1 | 164 (29.9) | 1,149 (34.1) | 1,092 (36.4) |
| 2 | 141 (25.7) | 792 (23.5) | 632 (21.1) |
| 3 | 76 (13.8) | 464 (13.8) | 432 (14.4) |
| 4+ | 119 (21.7) | 685 (20.3) | 564 (18.8) |
| Lowest percent predicted FEV1 | <20% | 25 (4.6) | 231 (6.8) | 160 (5.3) |
| 20% to <30% | 103 (18.8) | 723 (21.4) | 586 (19.5) |
| 30% to <40% | 161 (29.3) | 1,026 (30.4) | 856 (28.5) |
| 40% to <55% | 260 (47.4) | 1,394 (41.3) | 1,399 (46.6) |
| mMRC score | n (% non-missing) | 323 (58.8) | 2,015 (59.7) | 1,517 (50.5) |
| mMRC 0 | 37 (11.5) | 129 (6.4) | 131 (8.6) |
| mMRC 1 | 107 (33.1) | 754 (37.4) | 597 (39.4) |
| mMRC 2 | 98 (30.3) | 584 (29.0) | 432 (28.5) |
| mMRC 3 | 67 (20.7) | 445 (22.1) | 304 (20.0) |
| mMRC 4 | 14 (4.3) | 103 (5.1) | 53 (3.5) |

Numbers are presented as n (%). aBased on the presence of QOF diagnosis code for asthma. boccurrence of any one of: 1) COPD-related unscheduled hospital admission/A&E attendance, 2) an acute course of oral steroid, or 3) antibiotics prescribed with lower respiratory consultation. SMD: Standardized Mean Difference, SABA: Short Acting β agonist, SAMA: Short acting Muscarinic Antagonist, LAMA: Long acting muscarinic antagonist, LABA: Long acting β-agonist, LTRA: Leukotriene Receptor Antagonist, OCS: Oral corticosteroid

**Table S2*:* Matched baseline patient characteristics in patients without asthma**

|  |  | **BDP/FF vs FP/SAL** | | | **BDP/FF vs BUD/FF** | | |
| --- | --- | --- | --- | --- | --- | --- | --- |
|  |  | **BDP/FF**  **N=315** | **FP/SAL**  **N=315** | **SMD** | **BDP/FF**  **N=314** | **BUD/FF**  **N=314** | **SMD** |
| Gender | Male | 185 (58.7) | 184 (58.4) | 0.6 | 185 (58.9) | 189 (60.2) | 2.6 |
| Age (years)a | ≥35 <45 | 1 (0.3) | 1 (0.3) | 0.0 | 1 (0.3) | 1 (0.3) | 0.0 |
| ≥45 <55 | 19 (6.0) | 19 (6.0) | 20 (6.4) | 20 (6.4) |
| ≥55 <65 | 65 (20.6) | 65 (20.6) | 63 (20.1) | 63 (20.1) |
| ≥65 | 230 (73.0) | 230 (73.0) | 230 (73.2) | 230 (73.2) |
| BMI (kg/m2) | n (% non-missing) | 315 (100.0) | 313 (99.4) | **10.3** | 314 (100.0) | 312 (99.4) | **16.0** |
| <18.5 | 21 (6.7) | 16 (5.1) | 22 (7.0) | 29 (9.3) |
| ≥18.5-<25 | 115 (36.5) | 128 (40.9) | 112 (35.7) | 128 (41.0) |
| ≥25-<30 | 108 (34.3) | 103 (32.9) | 110 (35.0) | 97 (31.1) |
| ≥30 | 71 (22.5) | 66 (21.1) | 70 (22.3) | 58 (18.6) |
| Patient reported smoking status a | Non-smoker | 4 (1.3) | 4 (1.3) | 0.0 | 4 (1.3) | 4 (1.3) | 0.0 |
| Current smoker | 157 (49.8) | 157 (49.8) | 156 (49.7) | 156 (49.7) |
| Ex-smoker | 154 (48.9) | 154 (48.9) | 154 (49.0) | 154 (49.0) |
| Average daily dose of SABA (µg) | 0 | 76 (24.1) | 57 (18.1) | **21.0** | 75 (23.9) | 66 (21.0) | 7.2 |
| >0 to <200 | 58 (18.4) | 62 (19.7) | 59 (18.8) | 59 (18.8) |
| 200 to <400 | 69 (21.9) | 57 (18.1) | 67 (21.3) | 72 (22.9) |
| ≥400 | 112 (35.6) | 139 (44.1) | 113 (36.0) | 117 (37.3) |
| SAMA/SABA prescriptions | ≥1 | 3 (1.0) | 27 (8.6) | **36.4** | 3 (1.0) | 27 (8.6) | **36.4** |
| ICS combination inhalers prescription | 0 | 125 (39.7) | 135 (42.9) | 7.4 | 125 (39.8) | 162 (51.6) | **27.9** |
| 1 | 19 (6.0) | 18 (5.7) | 19 (6.1) | 17 (5.4) |
| 2-4 | 31 (9.8) | 29 (9.2) | 30 (9.6) | 31 (9.9) |
| 5-10 | 71 (22.5) | 71 (22.5) | 70 (22.3) | 61 (19.4) |
| ≥11 | 69 (21.9) | 62 (19.7) | 70 (22.3) | 43 (13.7) |
| Total ICS dosage (µg BDP equivalent) | 0-249 | 160 (50.8) | 155 (49.2) | **11.6** | 159 (50.6) | 188 (59.9) | **22.5** |
| 250-499 | 81 (25.7) | 71 (22.5) | 81 (25.8) | 54 (17.2) |
| 500+ | 74 (23.5) | 89 (28.3) | 74 (23.6) | 72 (22.9) |
| LAMA prescriptions | Yes | 217 (68.9) | 206 (65.4) | 7.4 | 217 (69.1) | 186 (59.2) | **20.7** |
| LABA prescriptions | Yes | 37 (11.7) | 50 (15.9) | **12.0** | 36 (11.5) | 76 (24.2) | **33.7** |
| Theophylline prescriptions | Yes | 16 (5.1) | 36 (11.4) | **23.2** | 16 (5.1) | 24 (7.6) | **10.4** |
| LTRA prescriptions | Yes | 7 (2.2) | 4 (1.3) | 7.3 | 7 (2.2) | 4 (1.3) | 7.3 |
| Maintenance OCS | Yes | 21 (6.7) | 15 (4.8) | 8.2 | 21 (6.7) | 8 (2.5) | **19.8** |
| Ischaemic heart disease diagnosis | Yes | 71 (22.5) | 48 (15.2) | **18.7** | 71 (22.6) | 54 (17.2) | **13.6** |
| Hypertension diagnosis | Yes | 129 (41.0) | 123 (39.0) | 3.9 | 129 (41.1) | 109 (34.7) | **13.2** |
| Diabetes diagnosis | Yes | 51 (16.2) | 26 (8.3) | **24.4** | 51 (16.2) | 26 (8.3) | **24.5** |
| Charlson Comorbidity Index | 0-2 | 242 (76.8) | 251 (79.7) | 7.2 | 240 (76.4) | 239 (76.1) | **10.1** |
| 3-4 | 43 (13.7) | 39 (12.4) | 44 (14.0) | 52 (16.6) |
| 5+ | 30 (9.5) | 25 (7.9) | 30 (9.6) | 23 (7.3) |
| Baseline Moderate/severe COPD exacerbationa,b | 0 | 27 (8.6) | 27 (8.6) | 0.0 | 26 (8.3) | 26 (8.3) | 0.0 |
| 1 | 94 (29.8) | 94 (29.8) | 94 (29.9) | 94 (29.9) |
| 2 | 82 (26.0) | 82 (26.0) | 82 (26.1) | 82 (26.1) |
| 3 | 49 (15.6) | 49 (15.6) | 49 (15.6) | 49 (15.6) |
| 4+ | 63 (20.0) | 63 (20.0) | 63 (20.1) | 63 (20.1) |
| Lowest percent predicted FEV1 a | <20% | 16 (5.1) | 16 (5.1) | 0.0 | 16 (5.1) | 16 (5.1) | 0.0 |
| 20% to <30% | 64 (20.3) | 64 (20.3) | 63 (20.1) | 63 (20.1) |
| 30% to <40% | 100 (31.7) | 100 (31.7) | 99 (31.5) | 99 (31.5) |
| 40% to <55% | 135 (42.9) | 135 (42.9) | 136 (43.3) | 136 (43.3) |
| mMRC score | n (% non-missing) | 315 (58.3) | 267 (49.4) | **33.9** | 187 (59.6) | 161 (51.3) | **26.4** |
| mMRC 0 | 24 (12.8) | 8 (4.7) | 24 (12.8) | 10 (6.2) |
| mMRC 1 | 63 (33.5) | 74 (43.0) | 62 (33.2) | 67 (41.6) |
| mMRC 2 | 61 (32.4) | 53 (30.8) | 60 (32.1) | 50 (31.1) |
| mMRC 3 | 31 (16.5) | 32 (18.6) | 32 (17.1) | 28 (17.4) |
| mMRC 4 | 9 (4.8) | 5 (2.9) | 9 (4.8) | 6 (3.7) |

Numbers are presented as n (%). **SMD values above 10 (indicating sufficient imbalance between comparison groups) are emphasized in bold**.  aMatching variables. bOccurrence of any one of: 1) COPD-related unscheduled hospital admission/A&E attendance, 2) an acute course of oral steroid, or 3) antibiotics prescribed with lower respiratory consultation. SMD: Standardized Mean Difference, SABA: Short Acting β-agonist, SAMA: Short Acting Muscarinic Agonist, LAMA: Long Acting Muscarinic Antagonist, LABA: Long Acting β-agonist, LTRA: Leukotriene Receptor Antagonist, OCS: Oral corticosteroid.

**Table S3. Unadjusted and adjusted odds ratio COPD exacerbation between BDP/FF and FP/SAL or BUD/FF**

|  | **Unadjusted OR (95% CI)** | **Adjusted OR(95% CI)** |
| --- | --- | --- |
| BDP/FF vs FP/SAL | 0.93 (0.71 - 1.21) | 0.89 (0.67 - 1.19)a |
| BDP/FF vs FP/SAL (excluding asthma) | 0.62 (0.43 - 0.90) | 0.64 (0.43 - 0.96)a |
| BDP/FF vs BUD/FF | 0.95 (0.72 - 1.24) | 0.79 (0.58 - 1.08)b |
| BDP/FF vs BUD/FF (excluding asthma) | 0.85 (0.59 - 1.21) | 0.79 (0.51 - 1.20)c |

aAdjusted for baseline ICS/LABA combination inhaler prescriptions, baseline SABA prescriptions, baseline SAMA/SABA prescriptions and active anxiety/depression. bAdjusted for theophylline prescription, ischemic heart disease diagnosis, and LTRA prescriptions. cAdjusted for SABA daily dose, ICS prescriptions, hypertension and diabetes diagnosis.
